# Supplementary material
Source: ML conference proceedings conference paper supplement (https://openaccess.thecvf.com/content/CVPR_2019/html/Yu_Robust_Video_Stabilization_CVPR_2019_paper.html)
Supplement: Supplementary file 1 [file Yu_Robust_Video_Stabilization_CVPR_2019_supplemental.pdf]

# Supplementary Material

Jiyang Yu  
University of California, San Diego  
jiy173@eng.ucsd.edu

Ravi Ramamoorthi  
University of California, San Diego  
ravir@cs.ucsd.edu

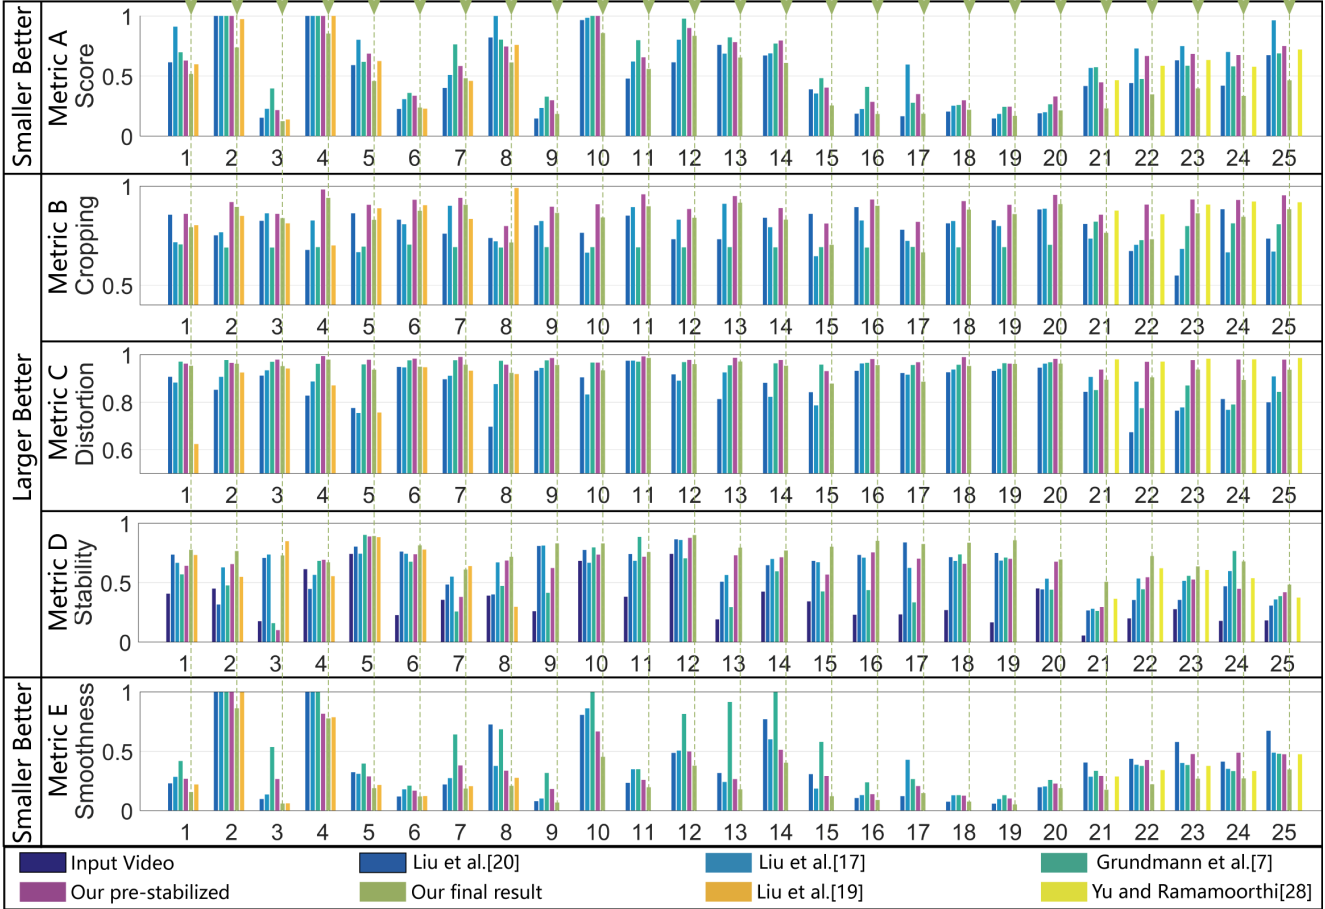

Figure 1: Complete quantitative comparison using our metric (Metric A), Liu et al.[1] metric (Metric B, C and D), Yu and Ramamoorthi[2] metric (Metric E). In metric A and E, a lower bar indicates a better result. In metric B, C and D, a higher bar indicates a better result. The result is normalized with the score of the input video for Metric A and E. Results that have a normalized score greater than one are clamped in this figure. Our method is marked with the dotted lines. The average values for these metrics are shown in Fig. 8 and 9 of the main paper.

## References

- [1] S. Liu, L. Yuan, P. Tan, and J. Sun. Bundled camera paths for video stabilization. *ACM Trans. Graph.*, 32(4), July 2013.
- [2] J. Yu and R. Ramamoorthi. Selfie video stabilization. In *ECCV*, 2018.
