# Supplementary material
Source: ML conference proceedings conference paper supplement (https://openaccess.thecvf.com/content/CVPR_2019/html/Yu_Robust_Video_Stabilization_CVPR_2019_paper.html)
Supplement: Supplementary file 2 [file Yu_Robust_Video_Stabilization_CVPR_2019_supplemental.pdf]

Archive with 2 entries (2 files):
- Video.txt
- Supplementary.pdf
