# Supplementary material
Source: ML conference proceedings conference paper supplement (https://openaccess.thecvf.com/content/CVPR_2019/html/Yu_Robust_Video_Stabilization_CVPR_2019_paper.html)
Supplement: Supplementary file 2 [file Yu_Robust_Video_Stabilization_CVPR_2019_supplemental.pdf › Video.txt]

https://youtu.be/oSIwtP765g8
